# Supplementary material
Source: PubMed Central journal article supplement (PMC3749783)
Supplement: NIHMS487972-supplement-1_si_001.pdf [file NIHMS487972-supplement-1_si_001.pdf]

**SUPPLEMENTAL INFORMATION****Spatially-Directed Protein Identification from Tissue Sections by Top-Down LC-MS/MS with  
Electron Transfer Dissociation****Kevin L. Schey, David M. Anderson, and Kristie L. Rose**

Department of Biochemistry and Mass Spectrometry Research Center,

Vanderbilt University School of Medicine, Nashville, TN

Abstract: The supplemental information provided in this document provides further support of the spatially-directed tissue extraction method. Specifically, this supplemental information contains two ETD tandem mass spectra showing abundant sequence ions used to identify proteins from tissue extracts.

ac-S<sup>1</sup>D<sup>1</sup>K P<sup>1</sup>D<sup>1</sup>M<sup>1</sup>A<sup>1</sup>E<sup>1</sup>I<sup>1</sup>E<sup>1</sup>K<sup>1</sup>F<sup>1</sup>D<sup>1</sup>K<sup>1</sup>S<sup>1</sup>K<sup>1</sup>L<sup>1</sup>K<sup>1</sup>K<sup>1</sup>T<sup>1</sup>E<sup>1</sup>T<sup>1</sup>Q<sup>1</sup>E<sup>1</sup>K<sup>1</sup>N P<sup>1</sup>L P<sup>1</sup>S<sup>1</sup>K<sup>1</sup>E<sup>1</sup>T<sup>1</sup>I<sup>1</sup>E<sup>1</sup>Q<sup>1</sup>E<sup>1</sup>K<sup>1</sup>Q A G E S

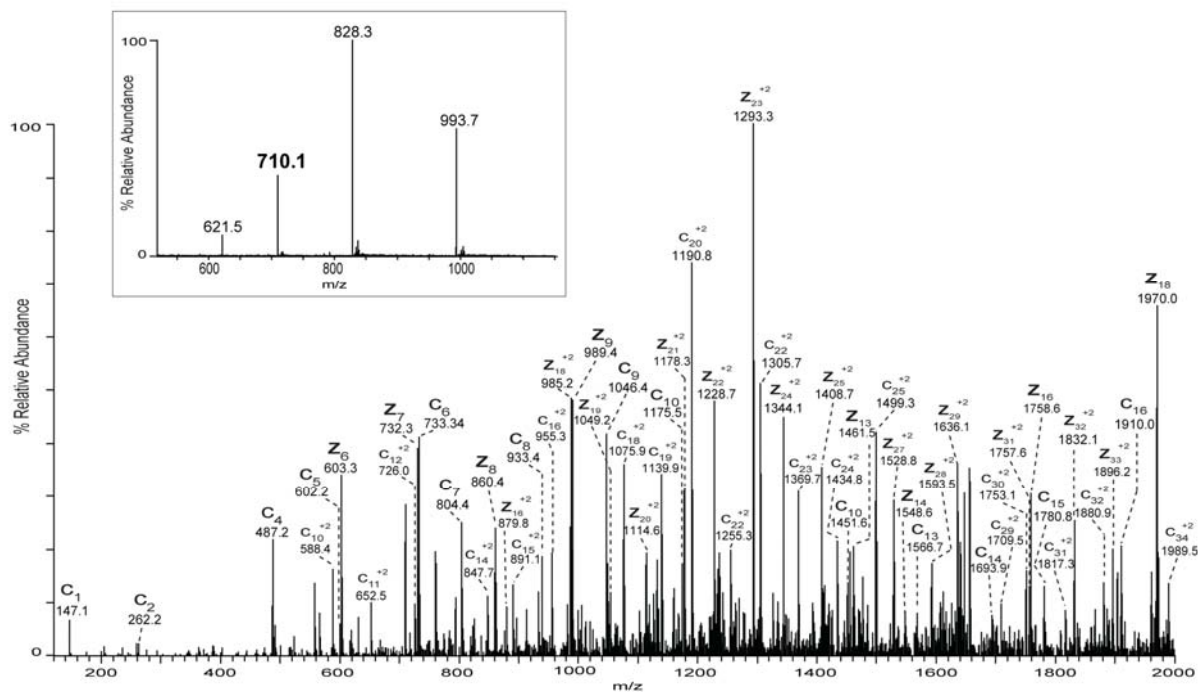

Supplemental Figure 1. ETD MS/MS spectrum of the  $[M+7H]^{+7}$  precursor ion ( $m/z$  710.1) of thymosin  $\beta$ 4. The observed distribution of this protein is displayed in blue ( $m/z$  4963) in the MALDI image of mouse brain (Figure 2).

ac-S Q A E F D K A A E E V K R L L K T Q P T . . .

. . . E S A M K T Y V E K V D E L K K K Y G I

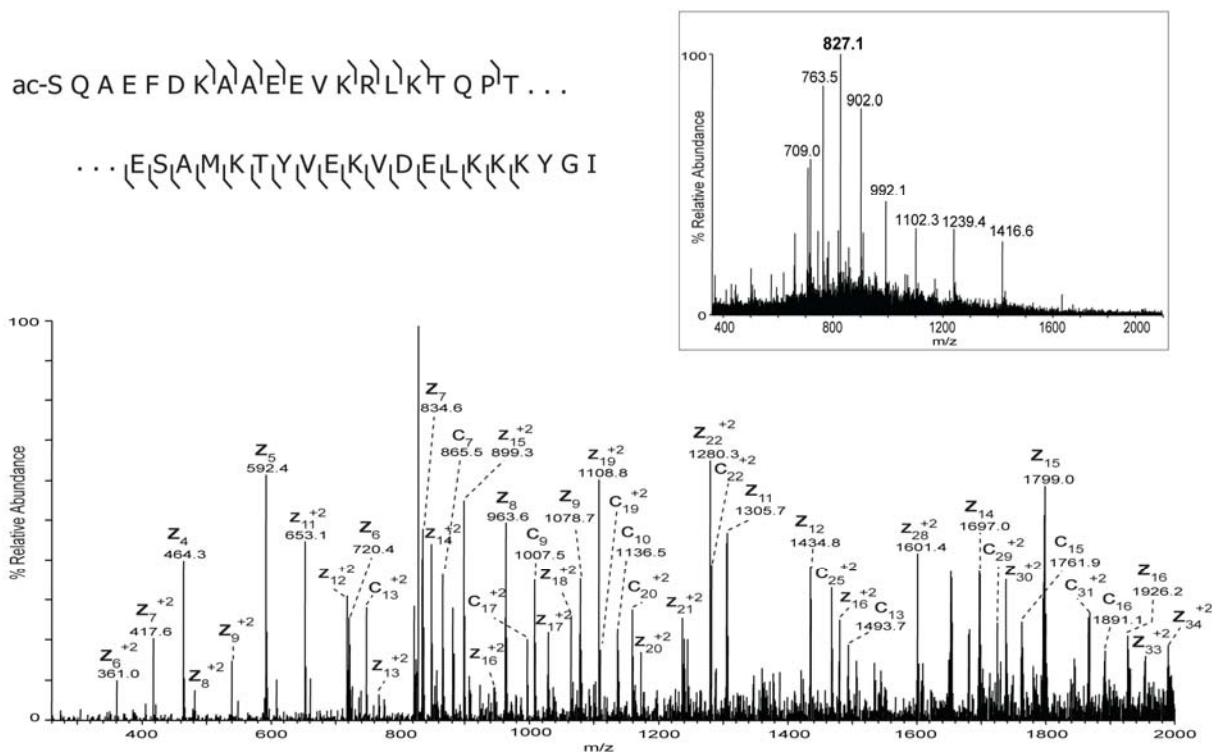

Supplemental Figure 2. ETD MS/MS spectrum of the [M+12H]<sup>12+</sup> precursor ion (m/z 827.1) of Acyl CoA-binding protein. The observed distribution of this protein is displayed in blue (m/z 9914) in the MALDI image of mouse kidney (Figure 3).
